# Supplementary material for: Isolation and Biological Activity of Iezoside and Iezoside B, SERCA Inhibitors from Floridian Marine Cyanobacteria
Source: MDPI journal article supplement (doi:10.3390/md21070378), 2023-06-27
Supplement: s1 [file s1]

## Supplementary Materials:

# Isolation and Biological Activity of Iezoside and Iezoside B, SERCA Inhibitors from Floridian Marine Cyanobacteria

Sofia Kokkaliari <sup>1</sup>, Danmeng Luo <sup>1</sup>, Valerie J. Paul <sup>2</sup> and Hendrik Luesch <sup>1,\*</sup>

<sup>1</sup> Department of Medicinal Chemistry and Center for Natural Products, Drug Discovery and Development (CNP3), University of Florida, 1345 Center Drive, Gainesville, FL 32610, USA

<sup>2</sup> Smithsonian Marine Station at Ft. Pierce, 701 Seaway Drive, Fort Pierce, FL 34949, USA

\* Correspondence: luesch@cop.ufl.edu; Tel.: +(352)-273-7738

## Contents:

|                                                                                                                    |     |
|--------------------------------------------------------------------------------------------------------------------|-----|
| Figure S1. <sup>1</sup> H NMR of iezoside ( <b>1</b> ) in DMSO- <i>d</i> <sub>6</sub> (600 MHz) .....              | S2  |
| Figure S2. <sup>13</sup> C NMR of iezoside ( <b>1</b> ) in DMSO- <i>d</i> <sub>6</sub> (150 MHz) .....             | S3  |
| Figure S3. COSY NMR of iezoside ( <b>1</b> ) in DMSO- <i>d</i> <sub>6</sub> (600 MHz) .....                        | S4  |
| Figure S4. HSQC of iezoside ( <b>1</b> ) in DMSO- <i>d</i> <sub>6</sub> (600 MHz) .....                            | S5  |
| Figure S5. HMBC of iezoside ( <b>1</b> ) in DMSO- <i>d</i> <sub>6</sub> (600 MHz) .....                            | S6  |
| Figure S6. 3Hz HMBC of iezoside ( <b>1</b> ) in DMSO- <i>d</i> <sub>6</sub> (600 MHz) .....                        | S7  |
| Figure S7. NOESY of iezoside ( <b>1</b> ) in DMSO- <i>d</i> <sub>6</sub> (600 MHz) .....                           | S8  |
| Figure S8. <sup>1</sup> H NMR of iezoside ( <b>1</b> ) in acetone- <i>d</i> <sub>6</sub> (600 MHz) .....           | S9  |
| Table S1. <sup>1</sup> H NMR comparison of iezoside ( <b>1</b> ) in acetone- <i>d</i> <sub>6</sub> (600 MHz) ..... | S10 |
| Figure S9. <sup>1</sup> H NMR of iezoside B ( <b>2</b> ) in DMSO- <i>d</i> <sub>6</sub> (600 MHz) .....            | S11 |
| Figure S10. <sup>13</sup> C NMR of iezoside B ( <b>2</b> ) in DMSO- <i>d</i> <sub>6</sub> (150 MHz) .....          | S12 |
| Figure S11. COSY of iezoside B ( <b>2</b> ) in DMSO- <i>d</i> <sub>6</sub> (600 MHz) .....                         | S13 |
| Figure S12. HSQC of iezoside B ( <b>2</b> ) in DMSO- <i>d</i> <sub>6</sub> (600 MHz) .....                         | S14 |
| Figure S13. HMBC of iezoside B ( <b>2</b> ) in DMSO- <i>d</i> <sub>6</sub> (600 MHz) .....                         | S15 |
| Figure S14. TOCSY of iezoside B ( <b>2</b> ) in DMSO- <i>d</i> <sub>6</sub> (600 MHz) .....                        | S16 |
| Figure S15. NOESY of iezoside B ( <b>2</b> ) in DMSO- <i>d</i> <sub>6</sub> (600 MHz) .....                        | S17 |
| Figure S16. Dose-response curve (cell viability) for thapsigargin in A549 cells at 48 h .....                      | S18 |
| Figure S17. Effect of thapsigargin on cytosolic calcium in A549 cells .....                                        | S18 |
| Figure S18. Dose-response curve (cell viability) for thapsigargin in HeLa cells at 48 h .....                      | S18 |
| Figure S19. Effect of thapsigargin in the cytosolic calcium in HeLa cells .....                                    | S19 |
| Figure S20. Dose-response curve (cell viability) for thapsigargin in HSAEC cells at 48 h .....                     | S19 |
| Figure S21. Dose-response curve (cell viability) for thapsigargin in primary cervical epithelial cells .....       | S19 |
| Reference .....                                                                                                    | S19 |

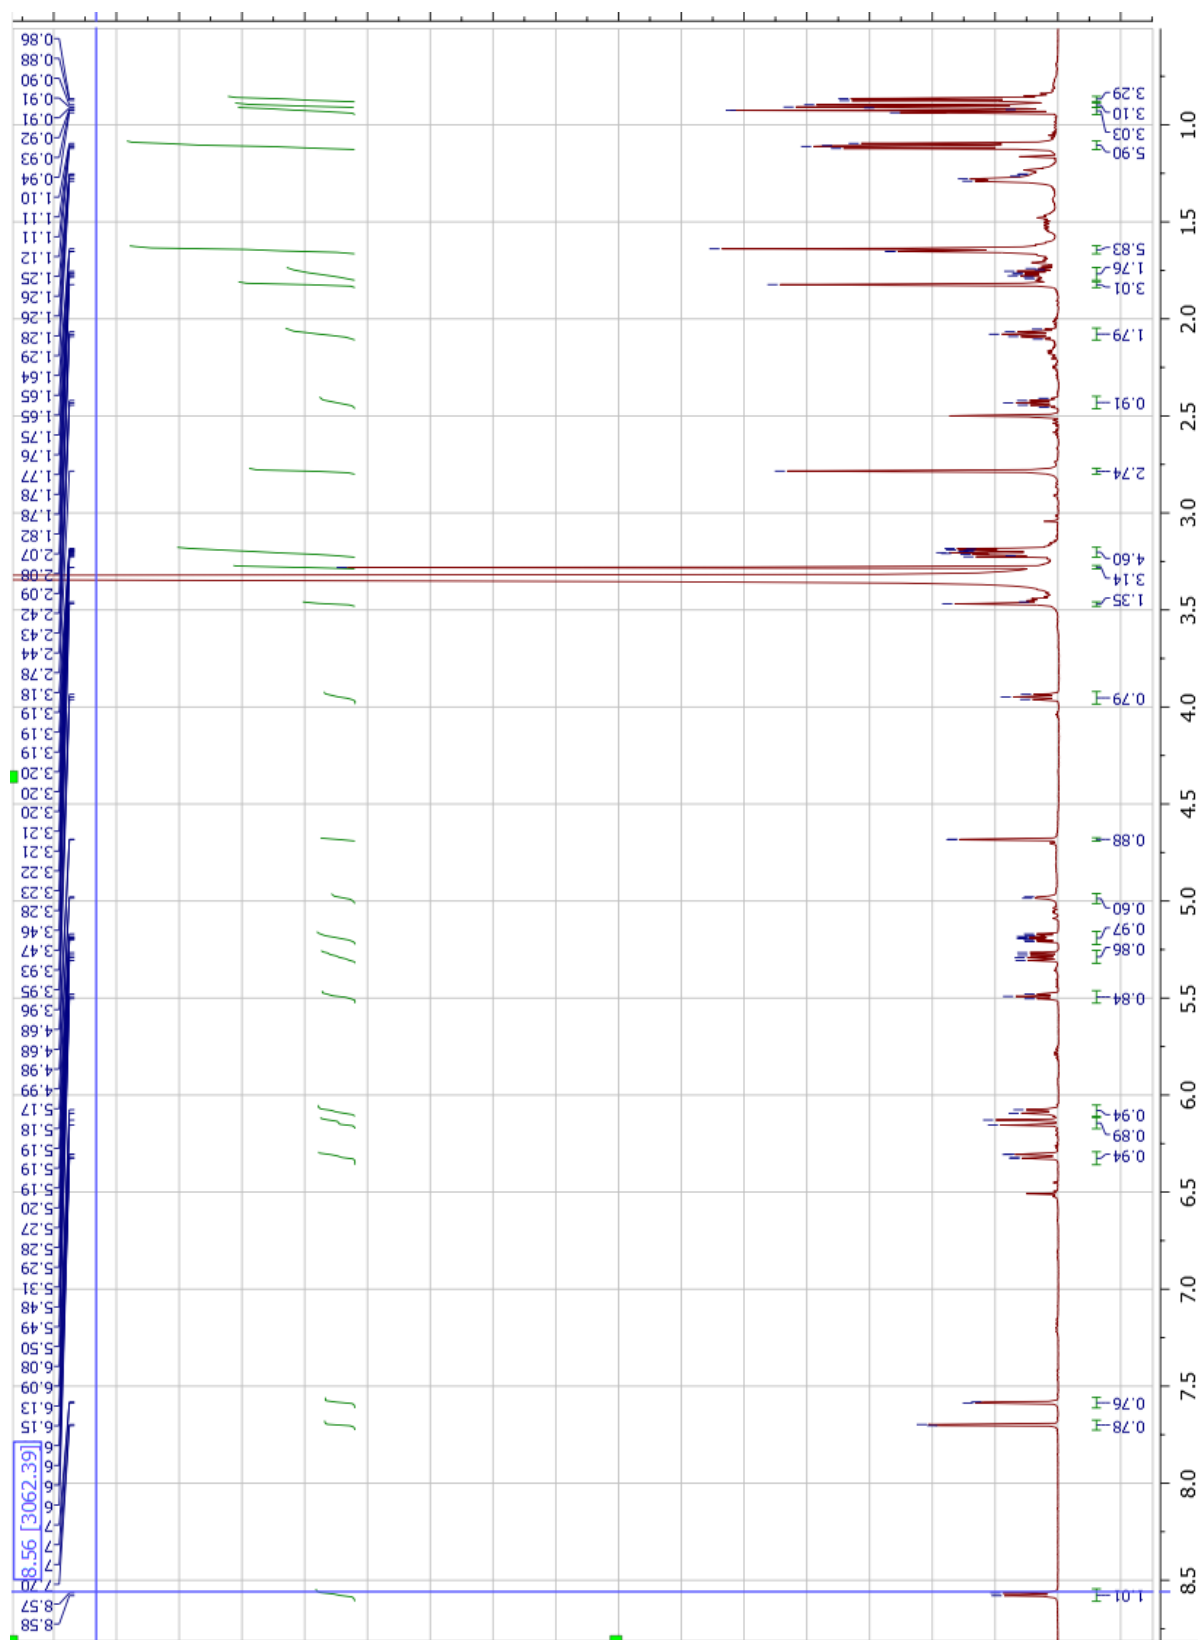

**Figure S1.**  $^1\text{H}$  NMR of iezoside (1) in  $\text{DMSO}-d_6$ .

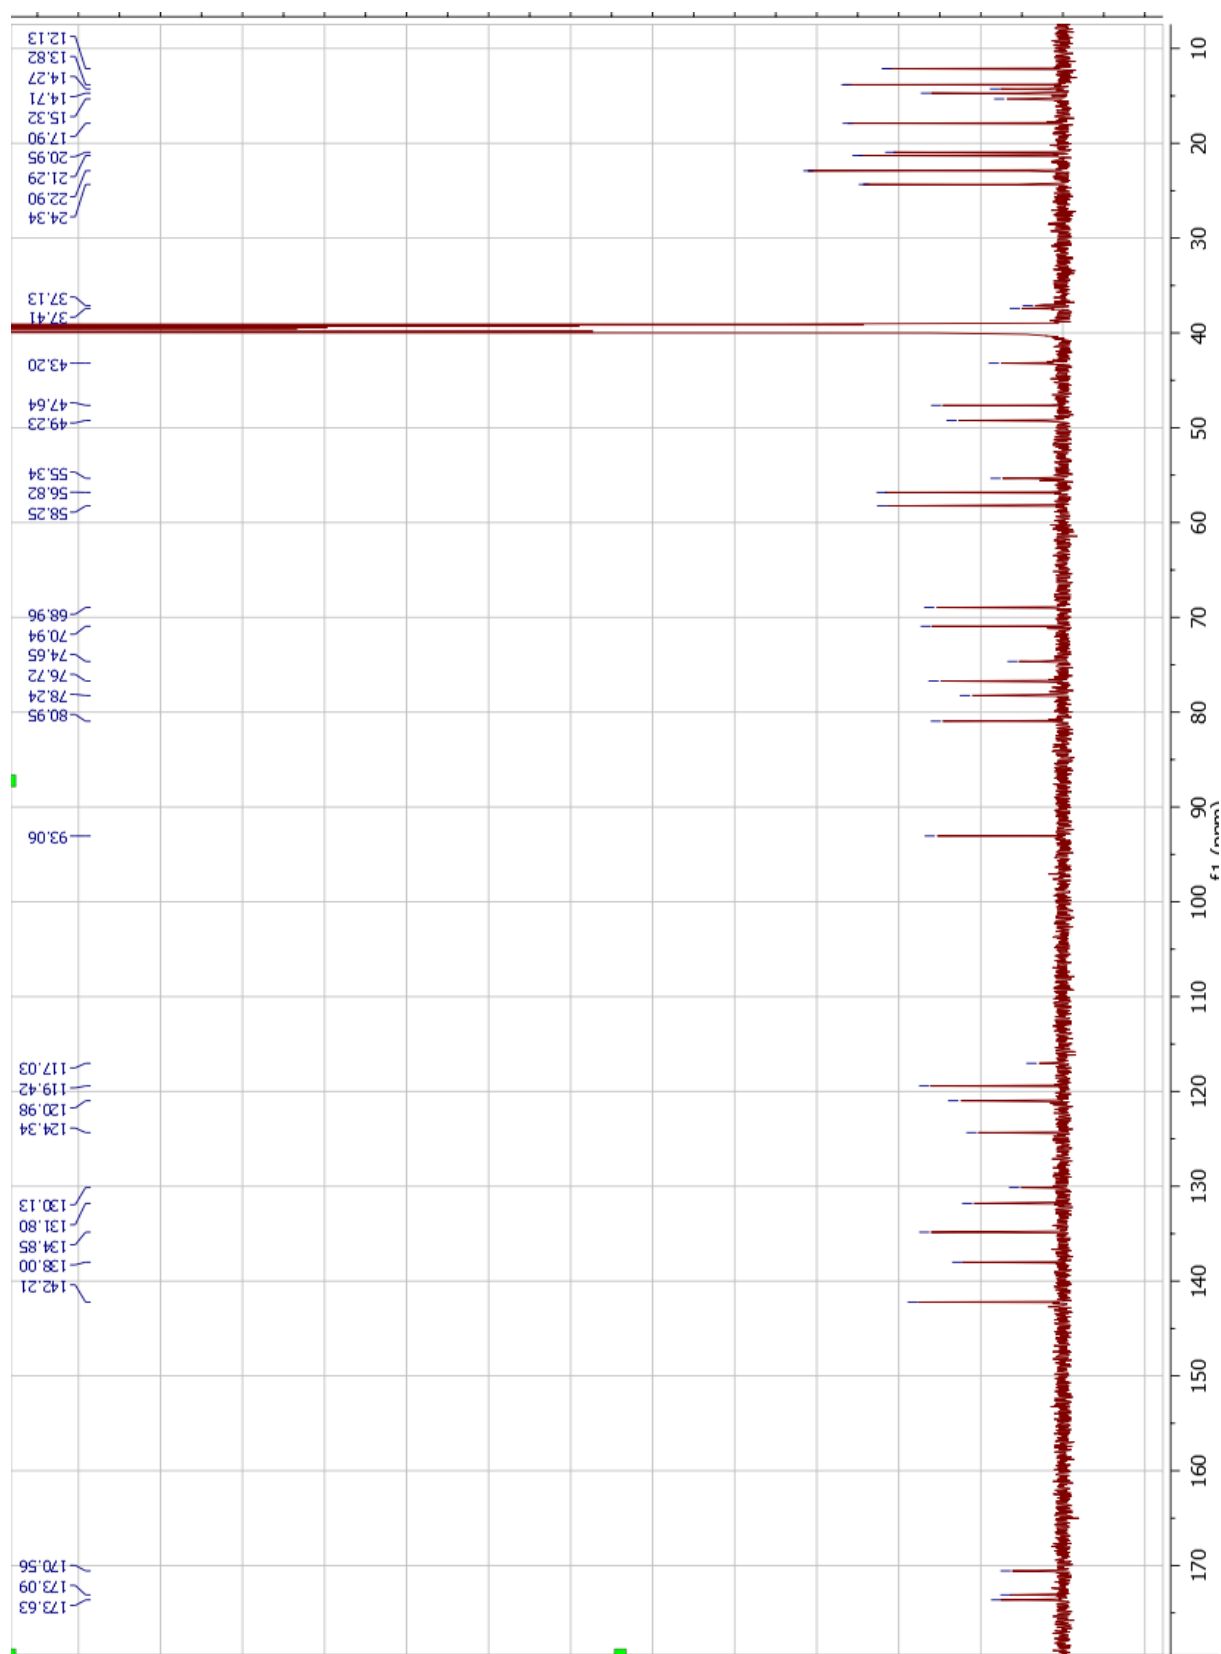

**Figure S2.** <sup>13</sup>C NMR of iezoside (1) in DMSO-*d*<sub>6</sub>.

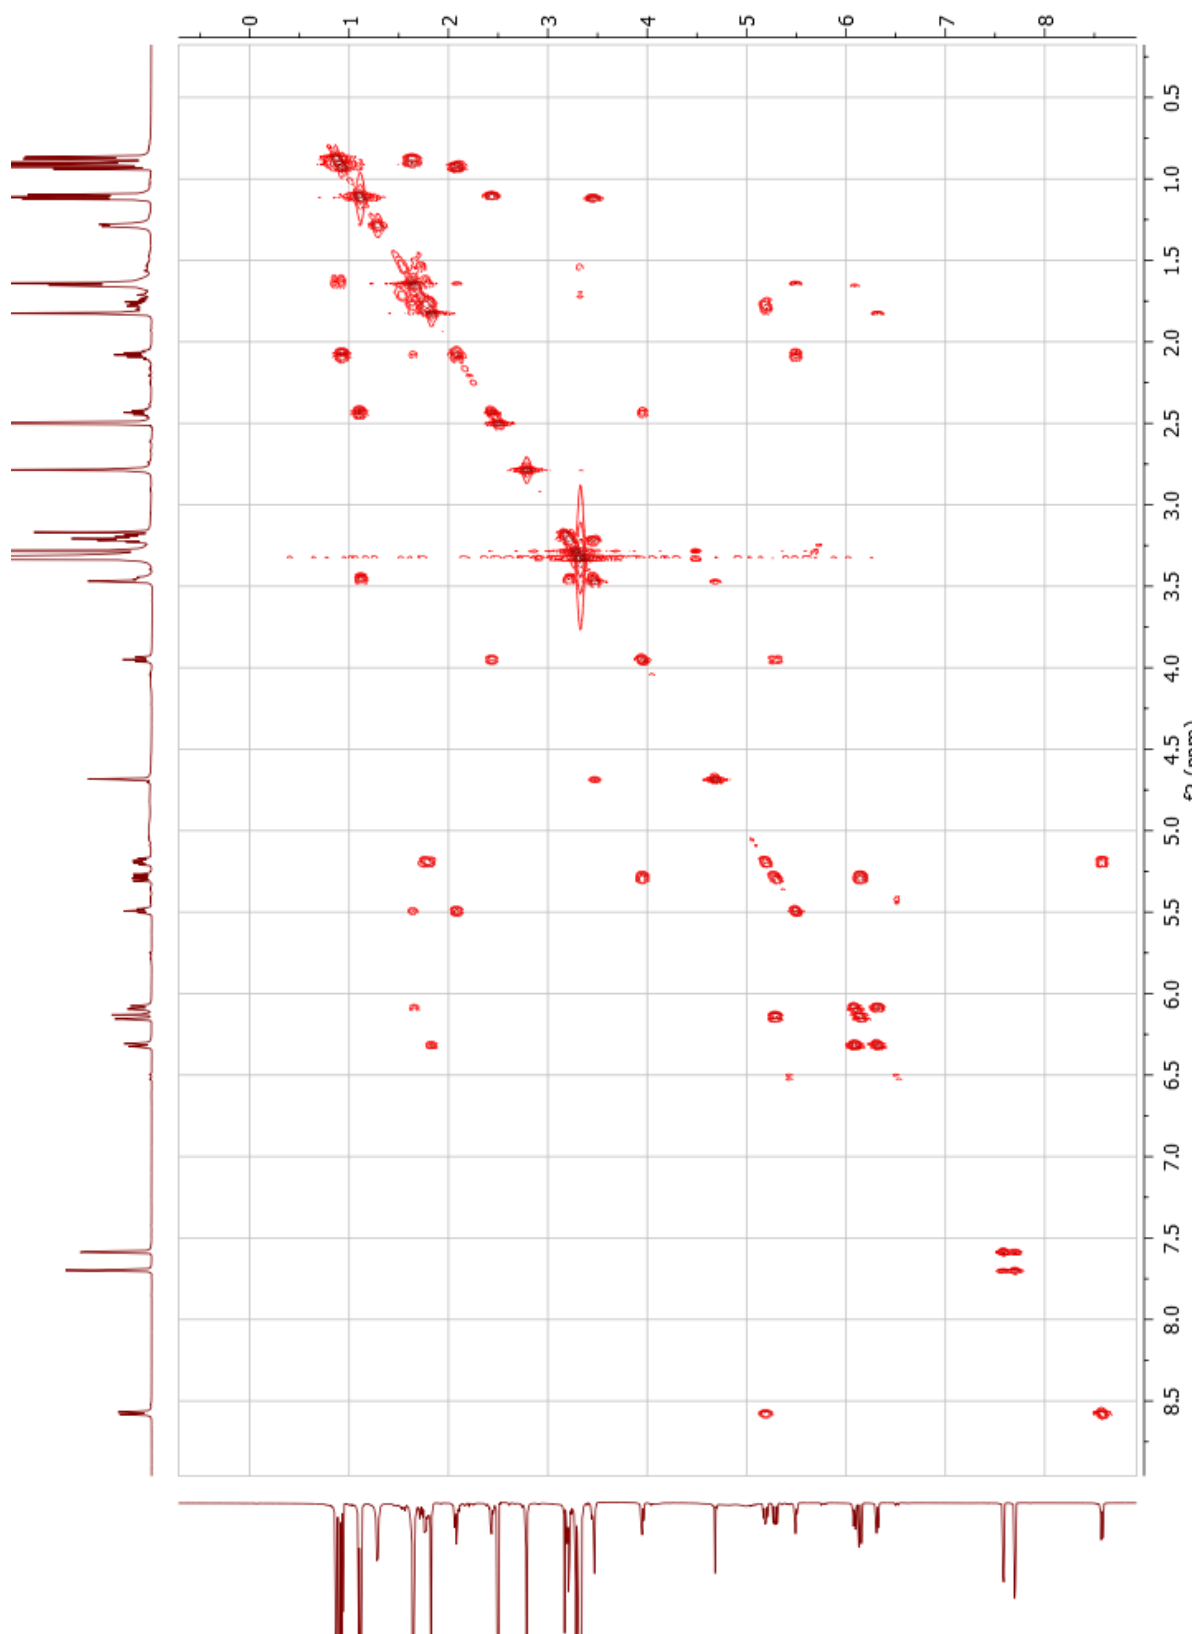

**Figure S3.** COSY NMR of iezoside (**1**) in DMSO- $d_6$ .

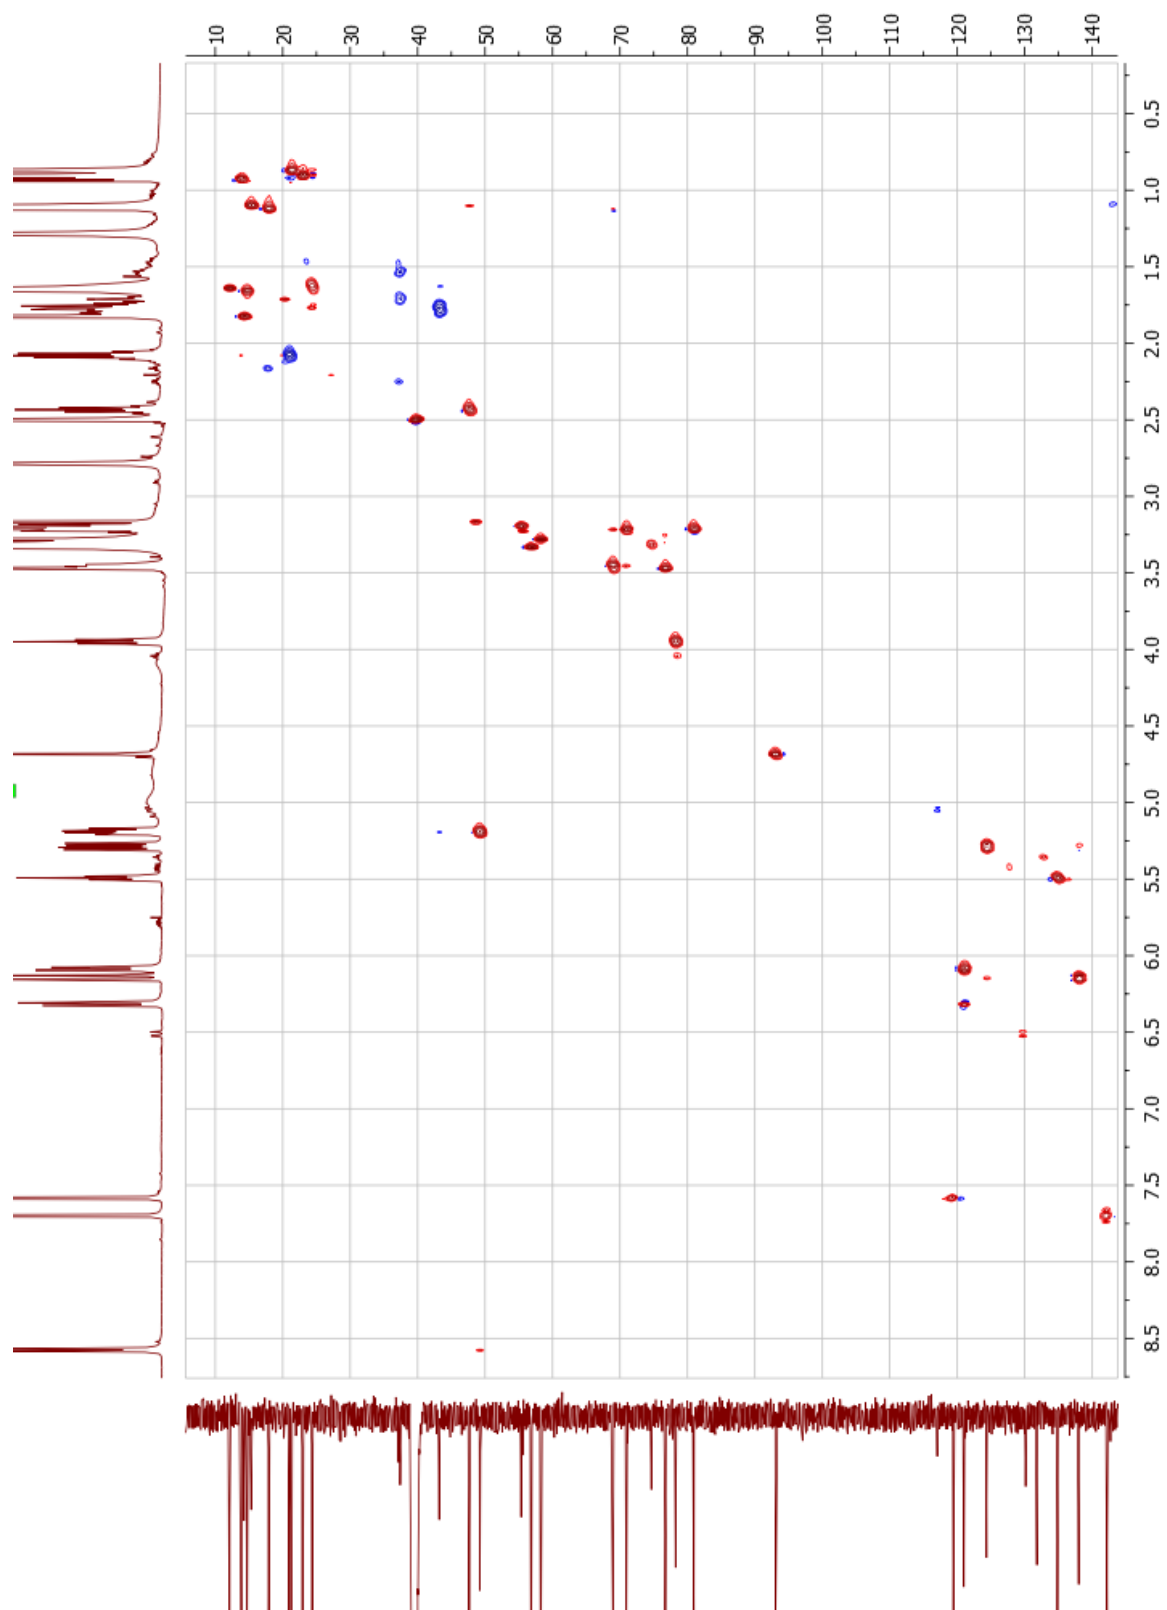

**Figure S4.** HSQC of iezoside (**1**) in DMSO-*d*<sub>6</sub>.

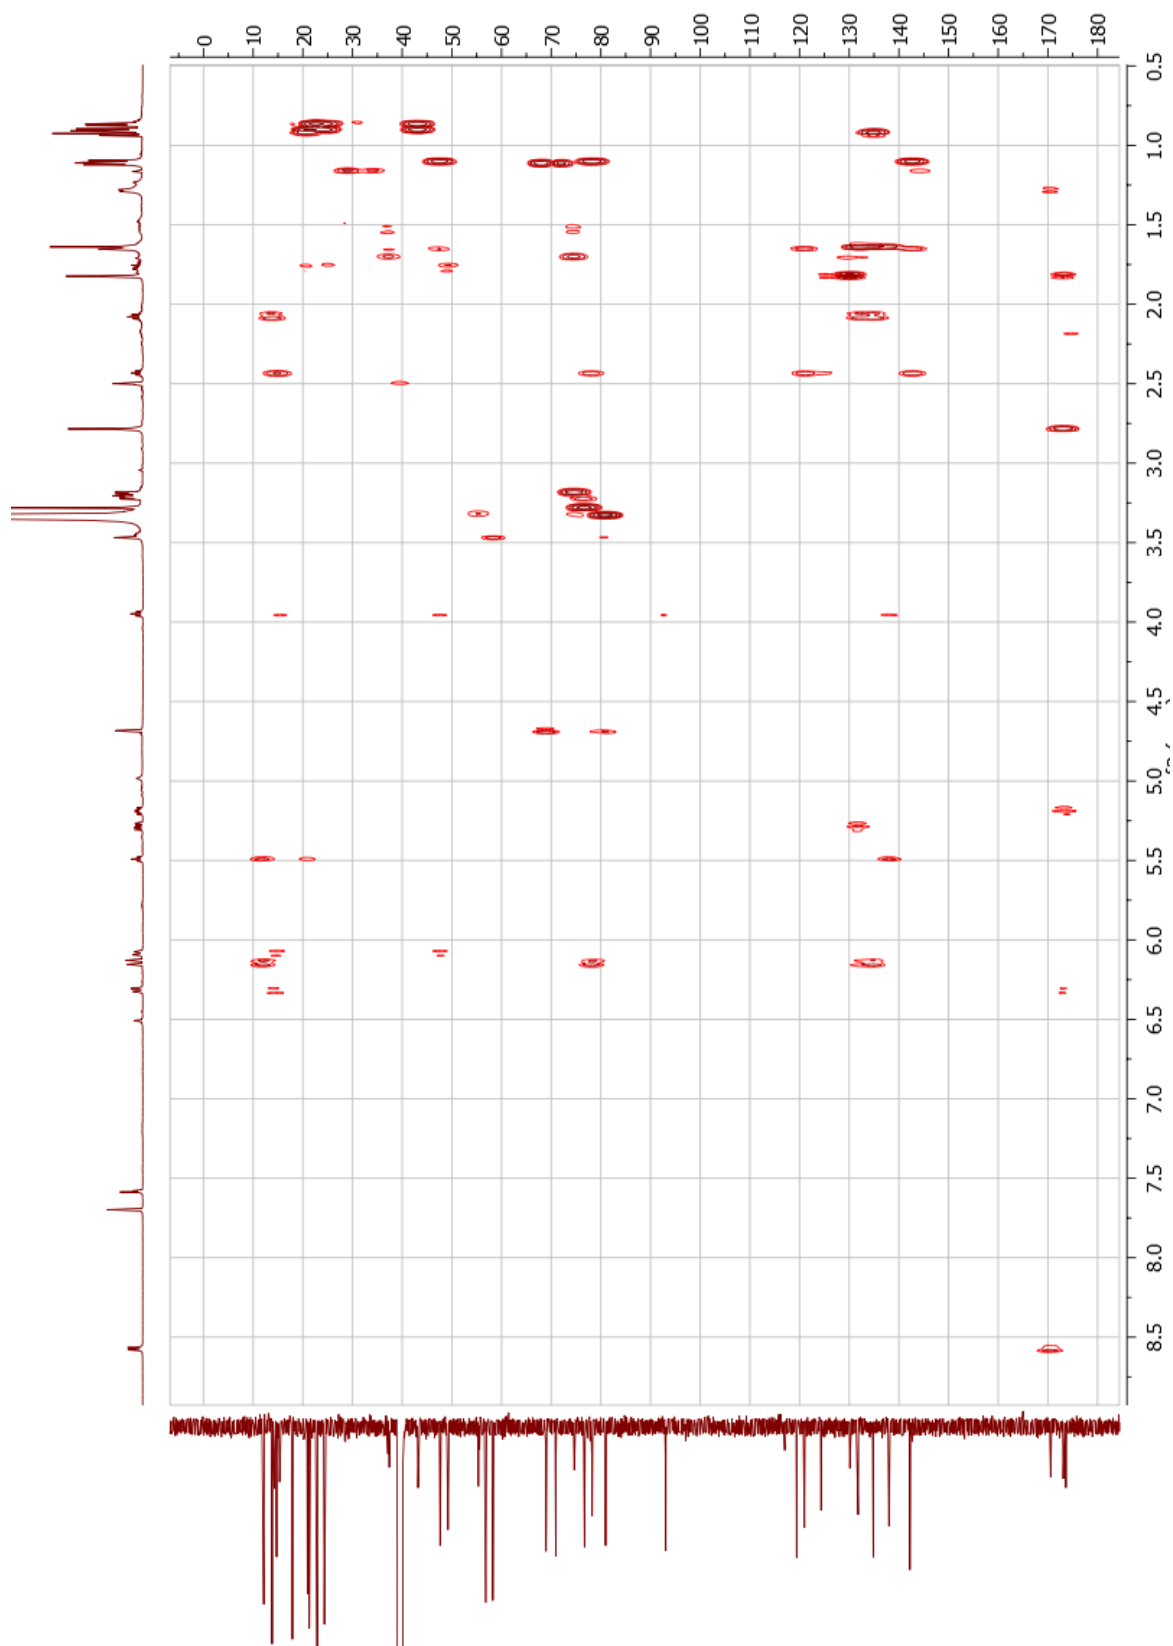

**Figure S5.** HMBC of iezoside (**1**) in DMSO- $d_6$ .

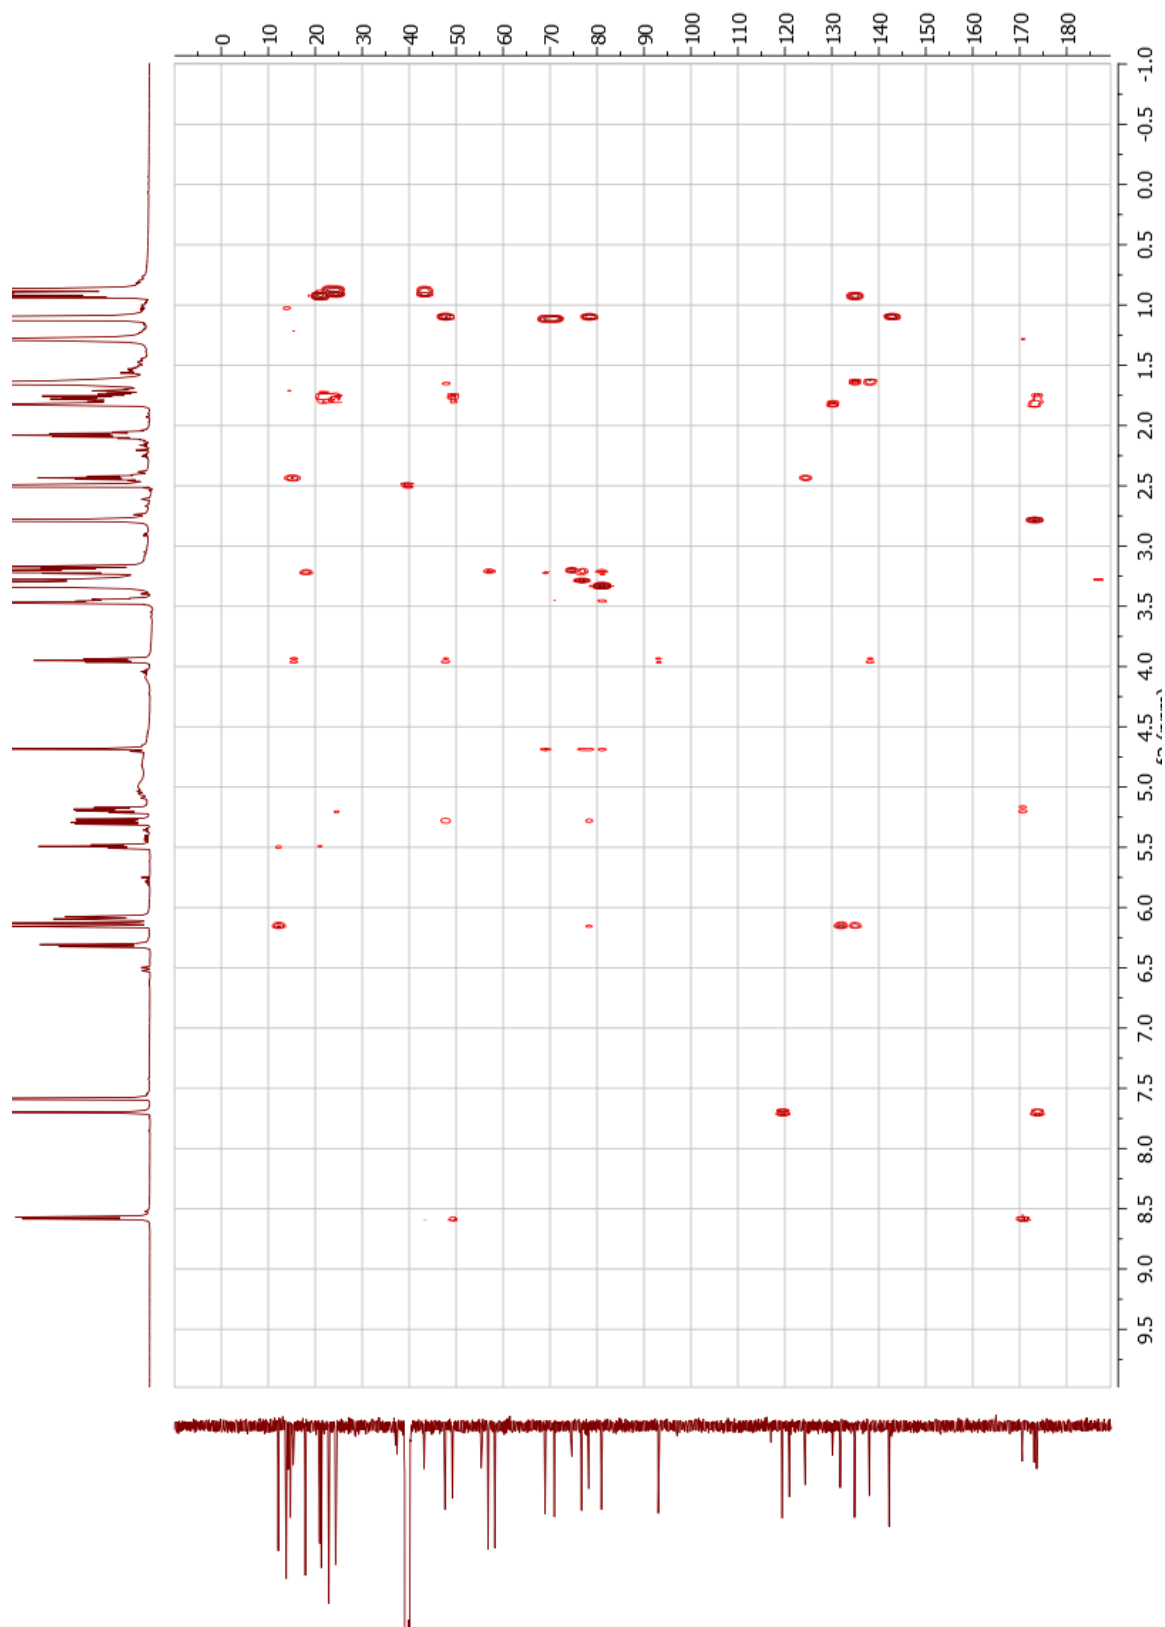

**Figure S6.** 3Hz HMBC of iezoside (**1**) in DMSO- $d_6$ .

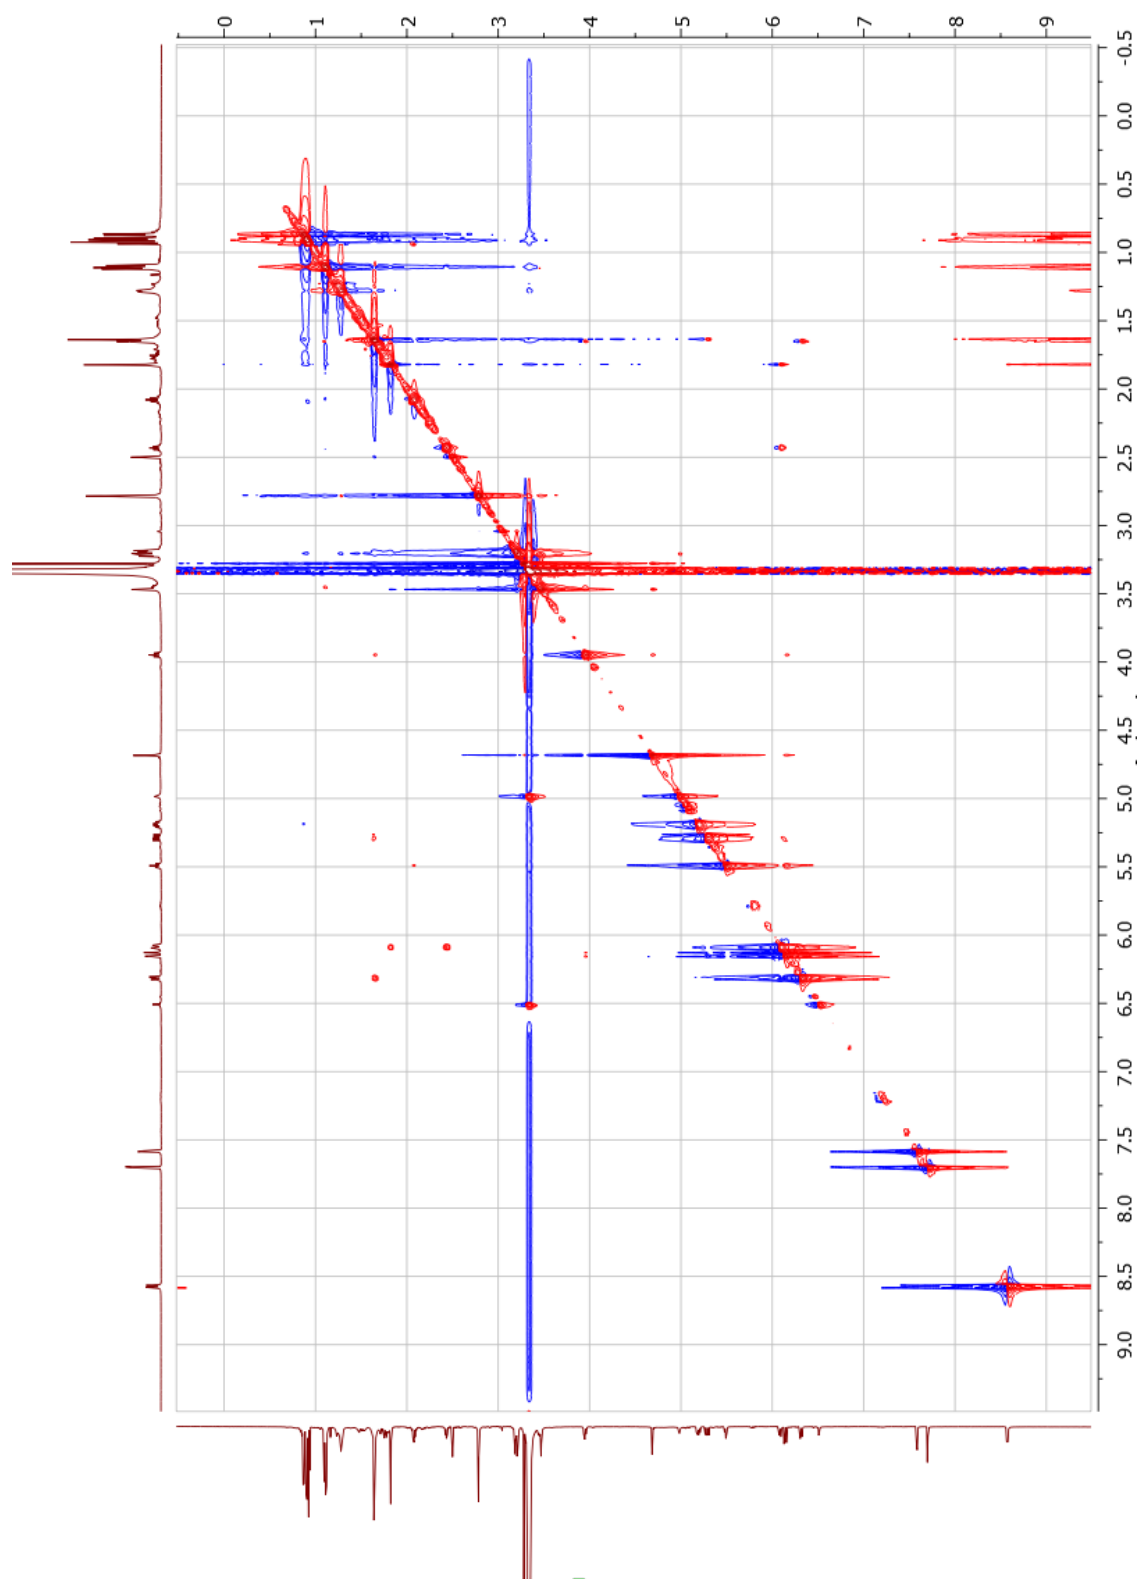

**Figure S7.** NOESY of iezoside (**1**) in DMSO- $d_6$ .



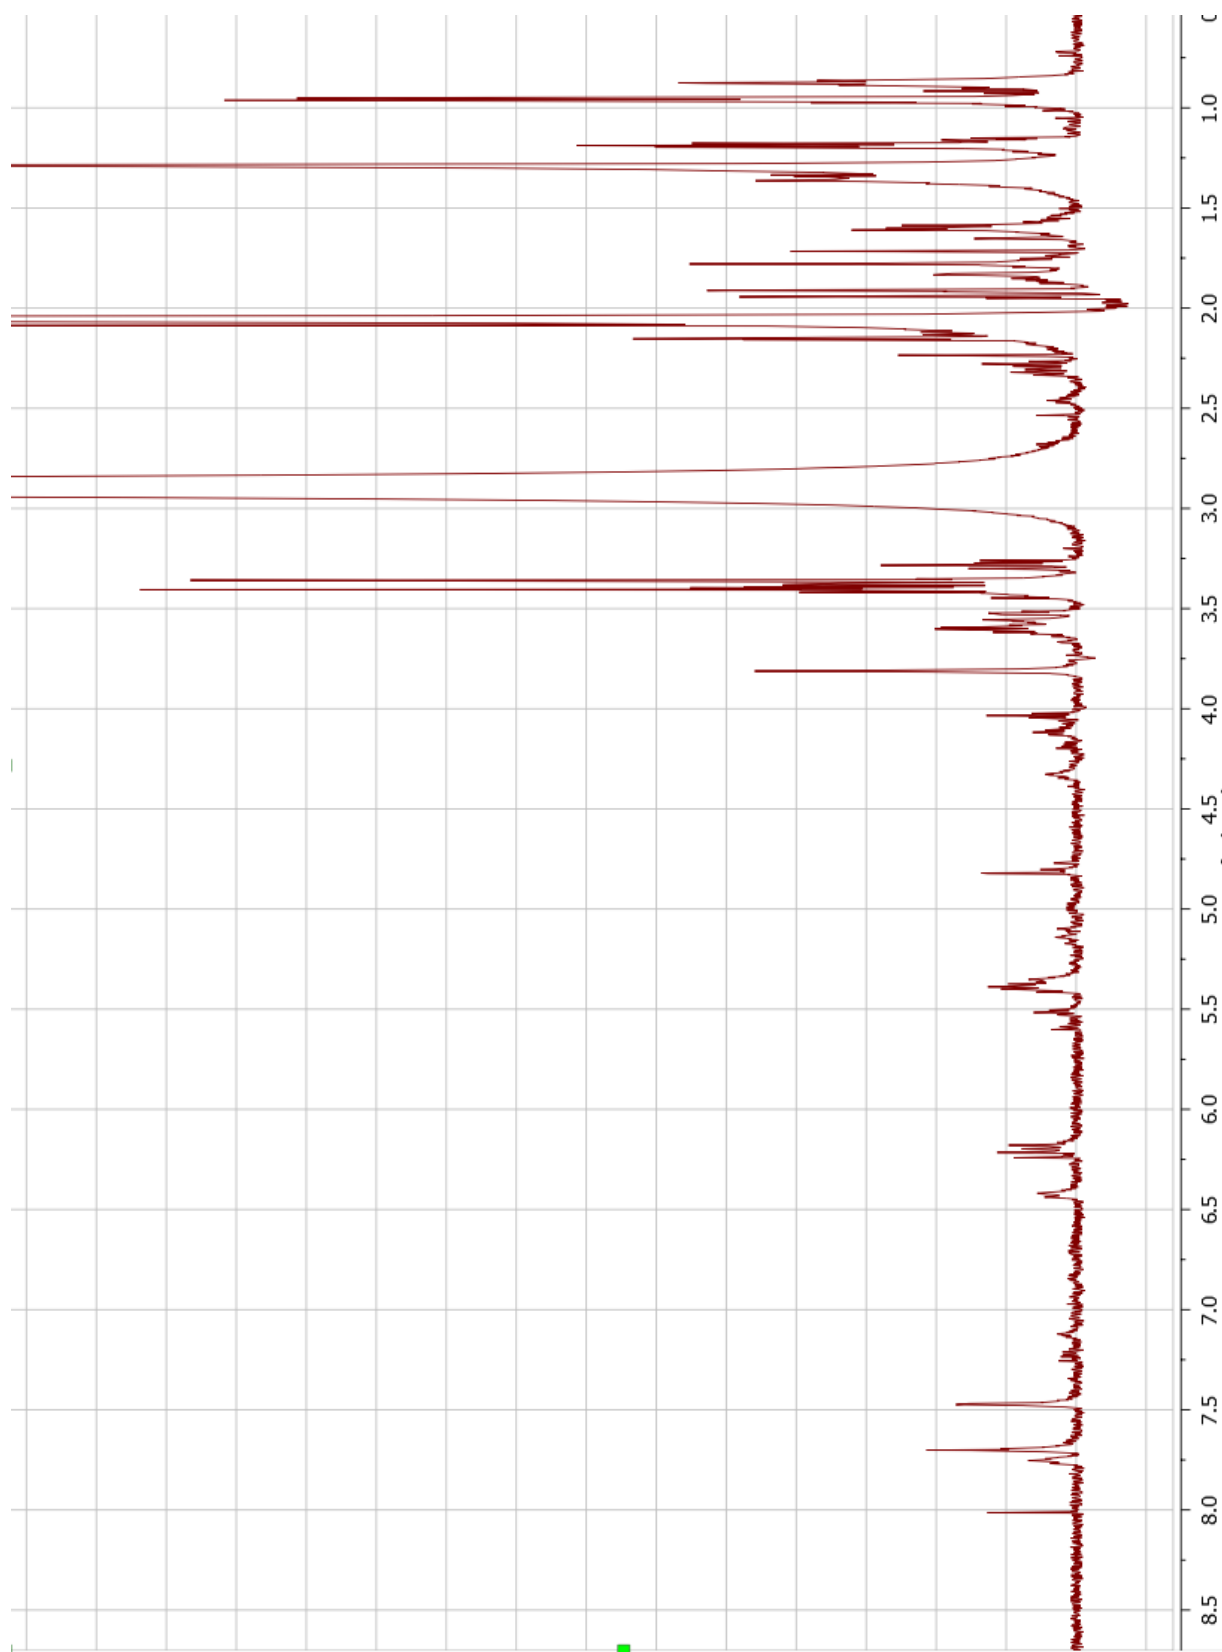

**Figure S8.**  $^1\text{H}$  NMR of iezoside (1) in acetone- $d_6$ .

**Table S1.** <sup>1</sup>H NMR comparison of lezoside (**1**) in Acetone-*d*<sub>6</sub>

|          | Reported <sup>1</sup>                       | Experimental                                |
|----------|---------------------------------------------|---------------------------------------------|
| Position | δ <sub>H</sub> , mult., J (Hz) <sup>a</sup> | δ <sub>H</sub> , mult., J (Hz) <sup>a</sup> |
| 1        | 7.70, d (3.2)                               | 7.70, d (3.3)                               |
| 2        | 7.48, d (3.2)                               | 7.47, d (3.3)                               |
| 3        |                                             |                                             |
| 4        | 5.40, m                                     | 5.40, m                                     |
| 5        | 1.85, m                                     | 1.85, m                                     |
| 6        | 1.77, m                                     | 1.77, m                                     |
| 7        | 0.96, d (6.4)                               | 0.96, d (6.4)                               |
| 8        | 0.96, d (6.4)                               | 0.96, d (6.4)                               |
| NH       | 7.74, d (8.5)                               |                                             |
| 9        |                                             |                                             |
| 10       | 4.99, br                                    | 4.99, br                                    |
| 11       | 1.35, d (6.7)                               | 1.35, d (6.1)                               |
| 12       | 2.86, s                                     | 2.79, s                                     |
| 13       |                                             |                                             |
| 14       |                                             |                                             |
| 15       | 6.43, d (11.3)                              | 6.43, d (11.6)                              |
| 16       | 6.19, d (11.3)                              | 6.19, d (11.8)                              |
| 17       |                                             |                                             |
| 18       | 2.46, dq (6.5, 6.9)                         | 2.46, m                                     |
| 19       | 4.12 dd (6.5, 8.6)                          | 4.12 dd (6.5, 8.7)                          |
| 20       | 5.40, dd (8.6, 16.0)                        | 5.40, m                                     |
| 21       | 6.23, d (16.0)                              | 6.23, d (15.7)                              |
| 22       |                                             |                                             |
| 23       | 5.52, t (7.7)                               | 5.52, t (7.6)                               |
| 24       | 2.14, dq (7.7, 7.5)                         | 2.14, m                                     |
| 25       | 0.96, t (7.5)                               | 0.96, m                                     |
| 26       | 1.91, d (0.9)                               | 1.91, d (1.0)                               |
| 27       | 1.78, s                                     | 1.78, s                                     |
| 28       | 1.18, d (6.9)                               | 1.18, d (6.8)                               |
| 29       | 1.72, s                                     | 1.72, s                                     |
| 30       | 4.82, d (1.7)                               | 4.82, d (1.8)                               |
| 31       | 3.56, dd (1.7, 2.9)                         | 3.60, m                                     |
| 32       | 3.37, dd (2.9, 8.8)                         | 3.37, m                                     |
| 33       | 3.44, dd (8.8, 9.3)                         | 3.45, m                                     |
| 34       | 3.60, qd (6.3, 9.3)                         | 3.60, m                                     |
| 35       | 1.19, d (6.3)                               | 1.19, d (6.2)                               |
| 36       | 3.36, s                                     | 3.36, s                                     |
| 37       | 3.40, s                                     | 3.40, s                                     |

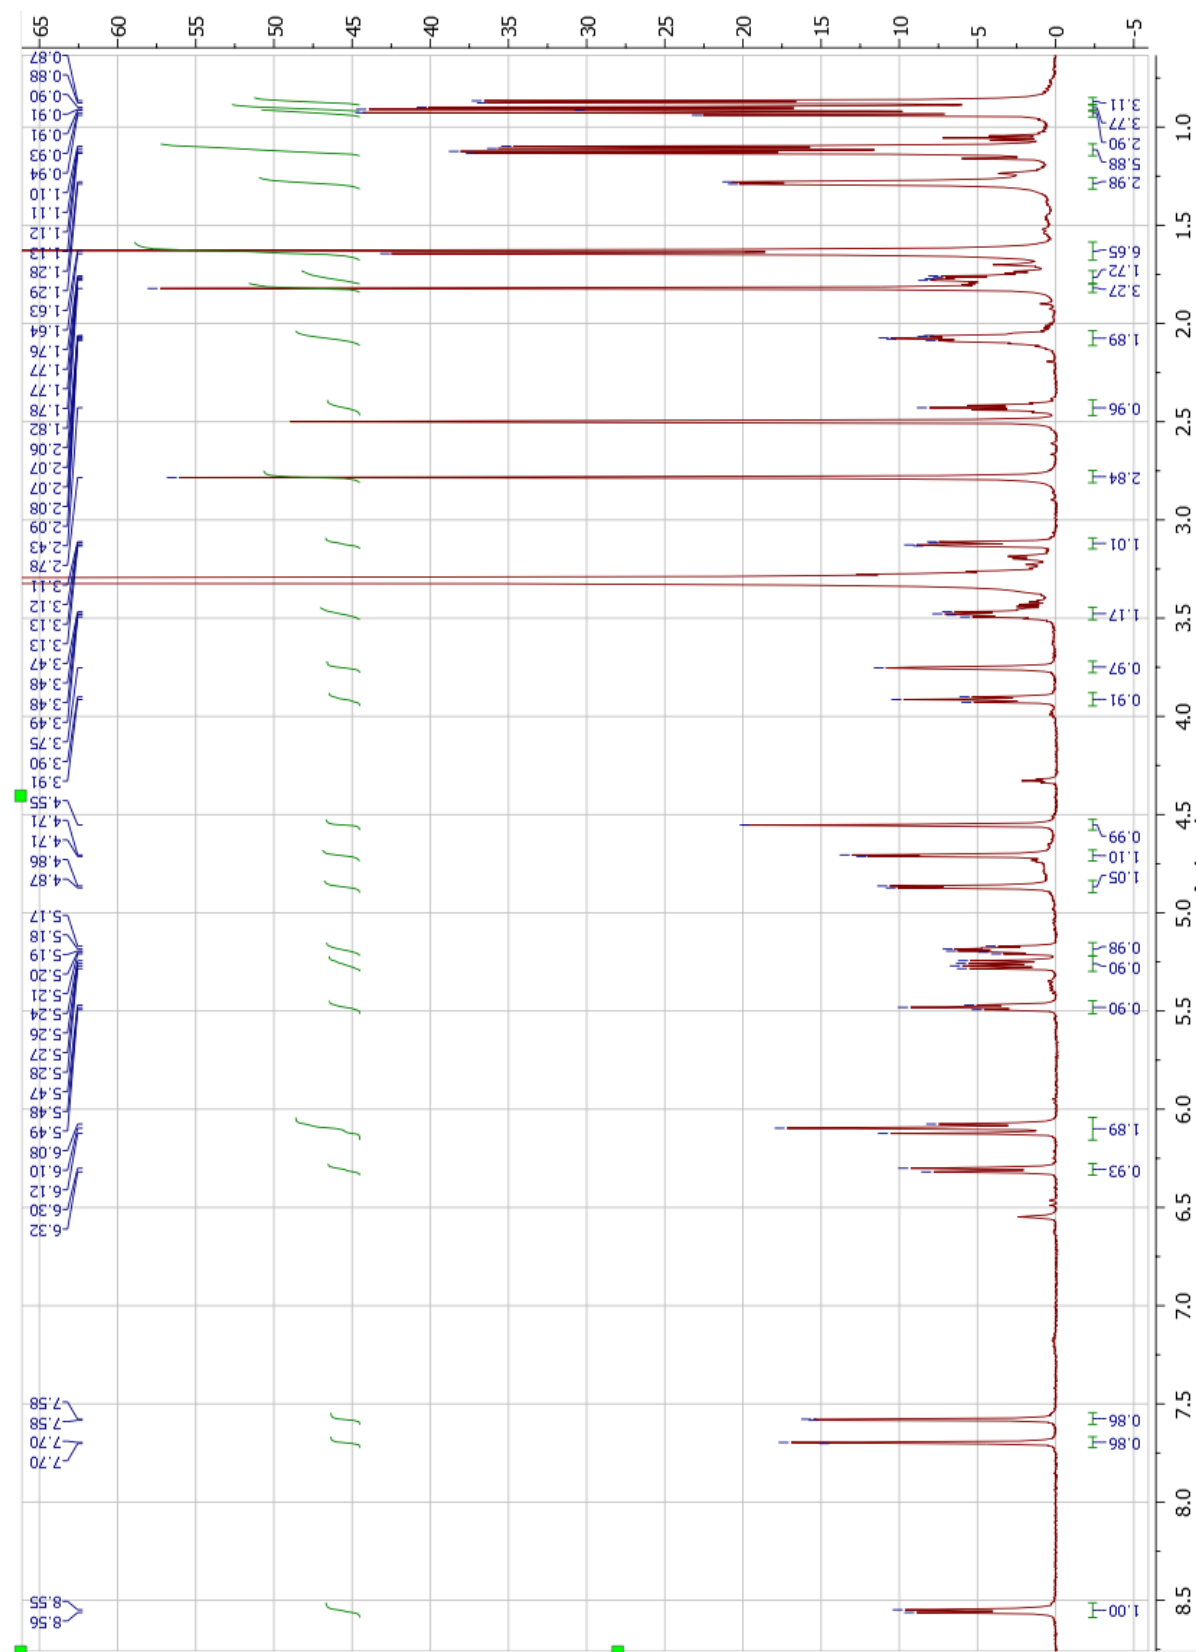

**Figure S9.**  $^1\text{H}$  NMR of iezoside B (**2**) in  $\text{DMSO}-d_6$ .

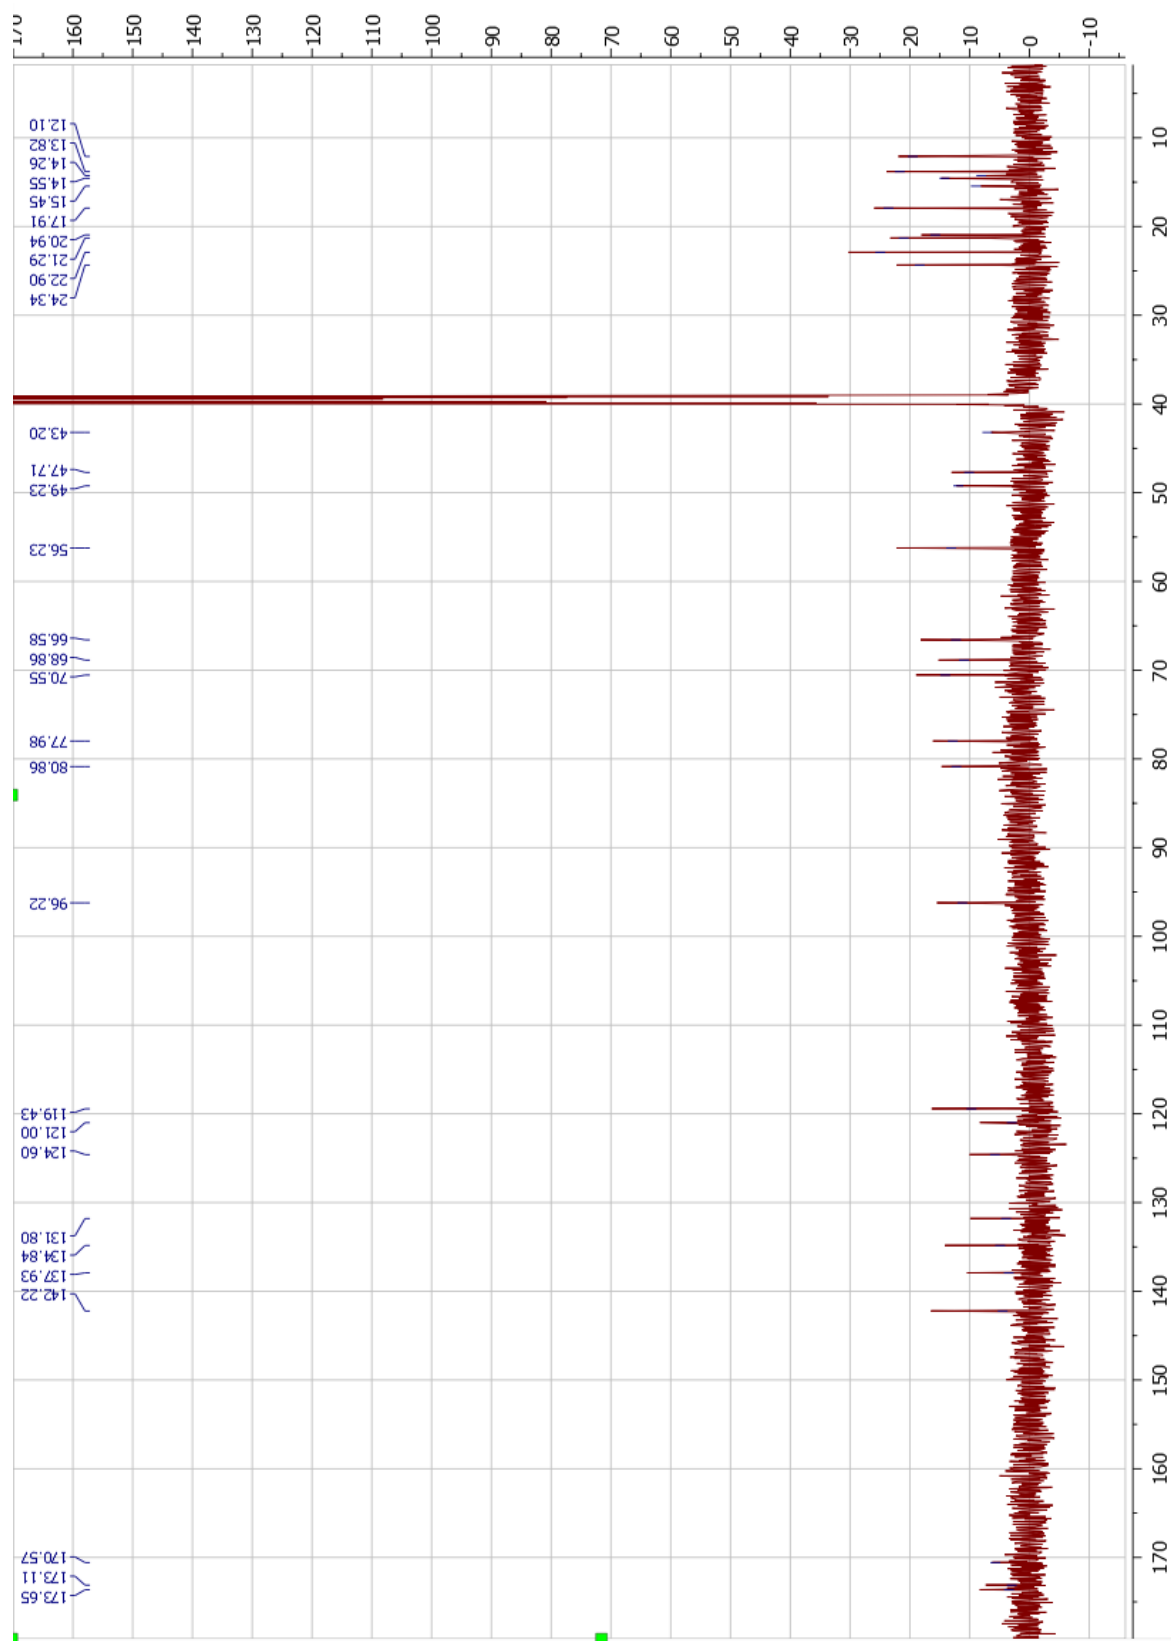

**Figure S10.** <sup>13</sup>C NMR of iezoside B (2) in DMSO-*d*<sub>6</sub>.

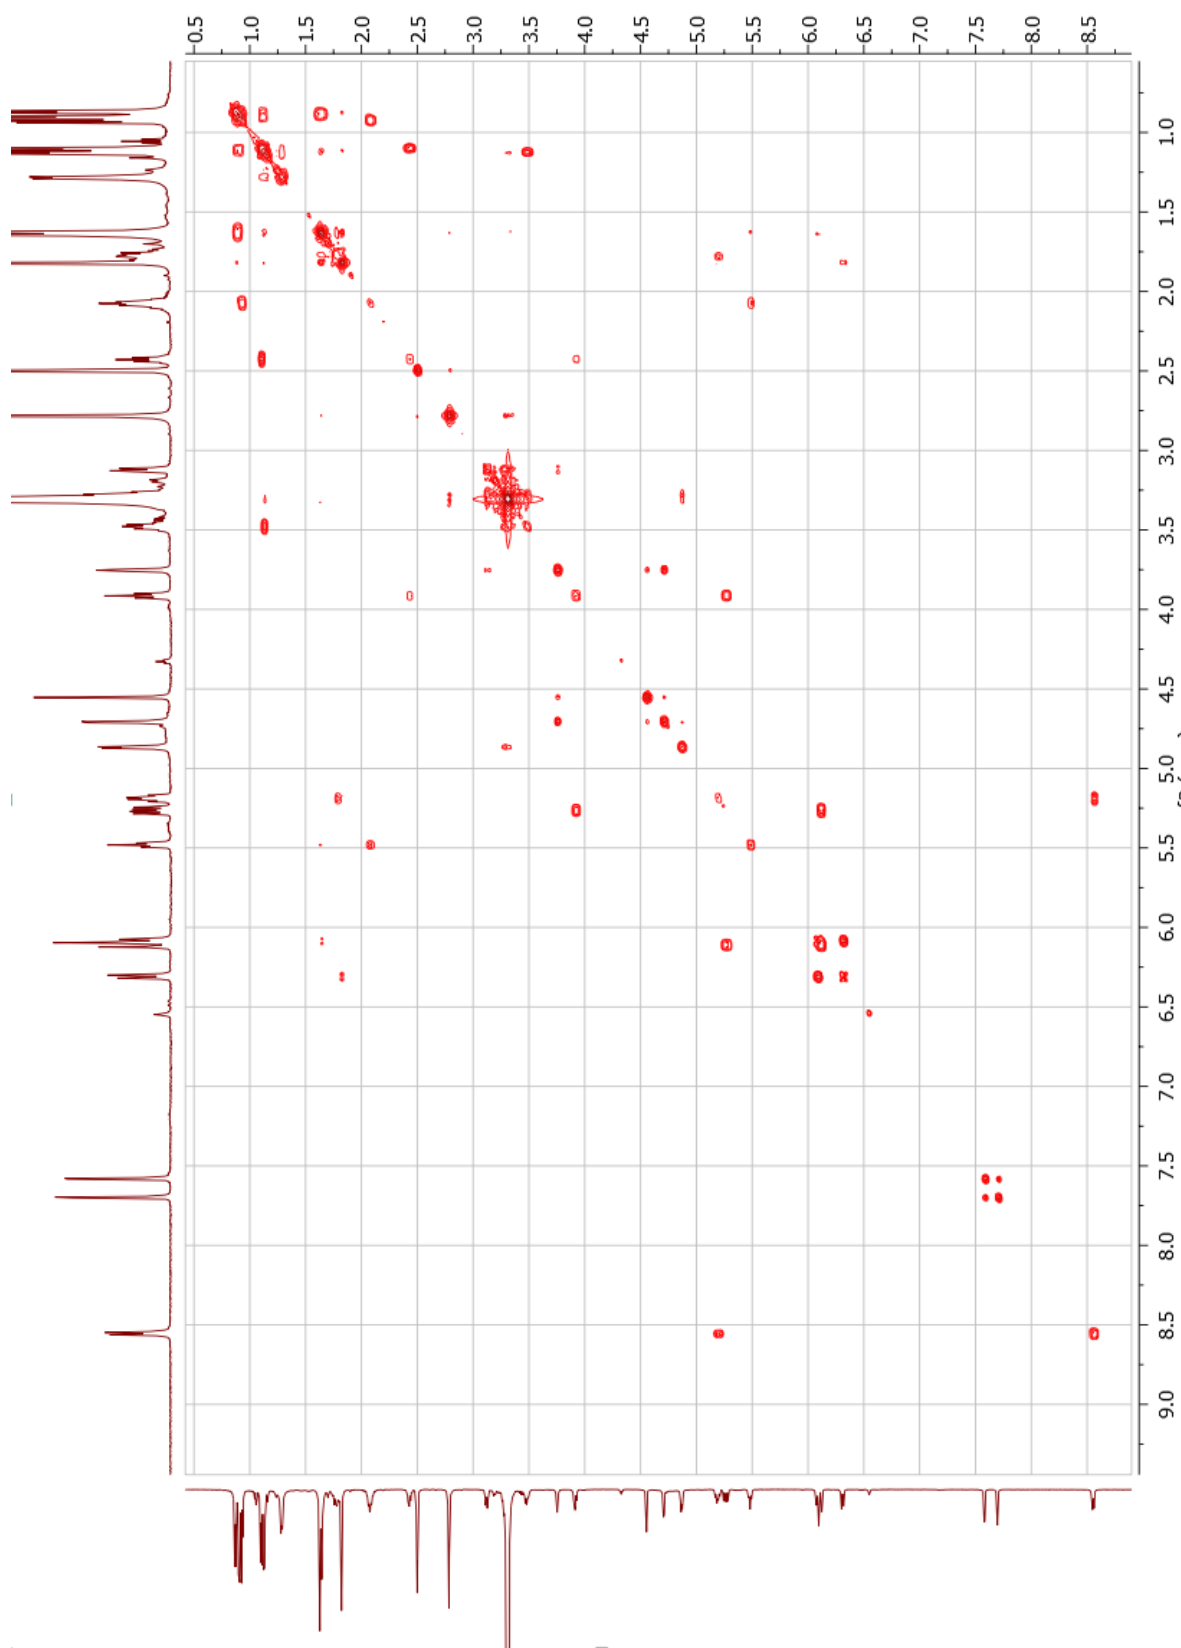

**Figure S11.** COSY of uezoside B (2) in DMSO- $d_6$ .

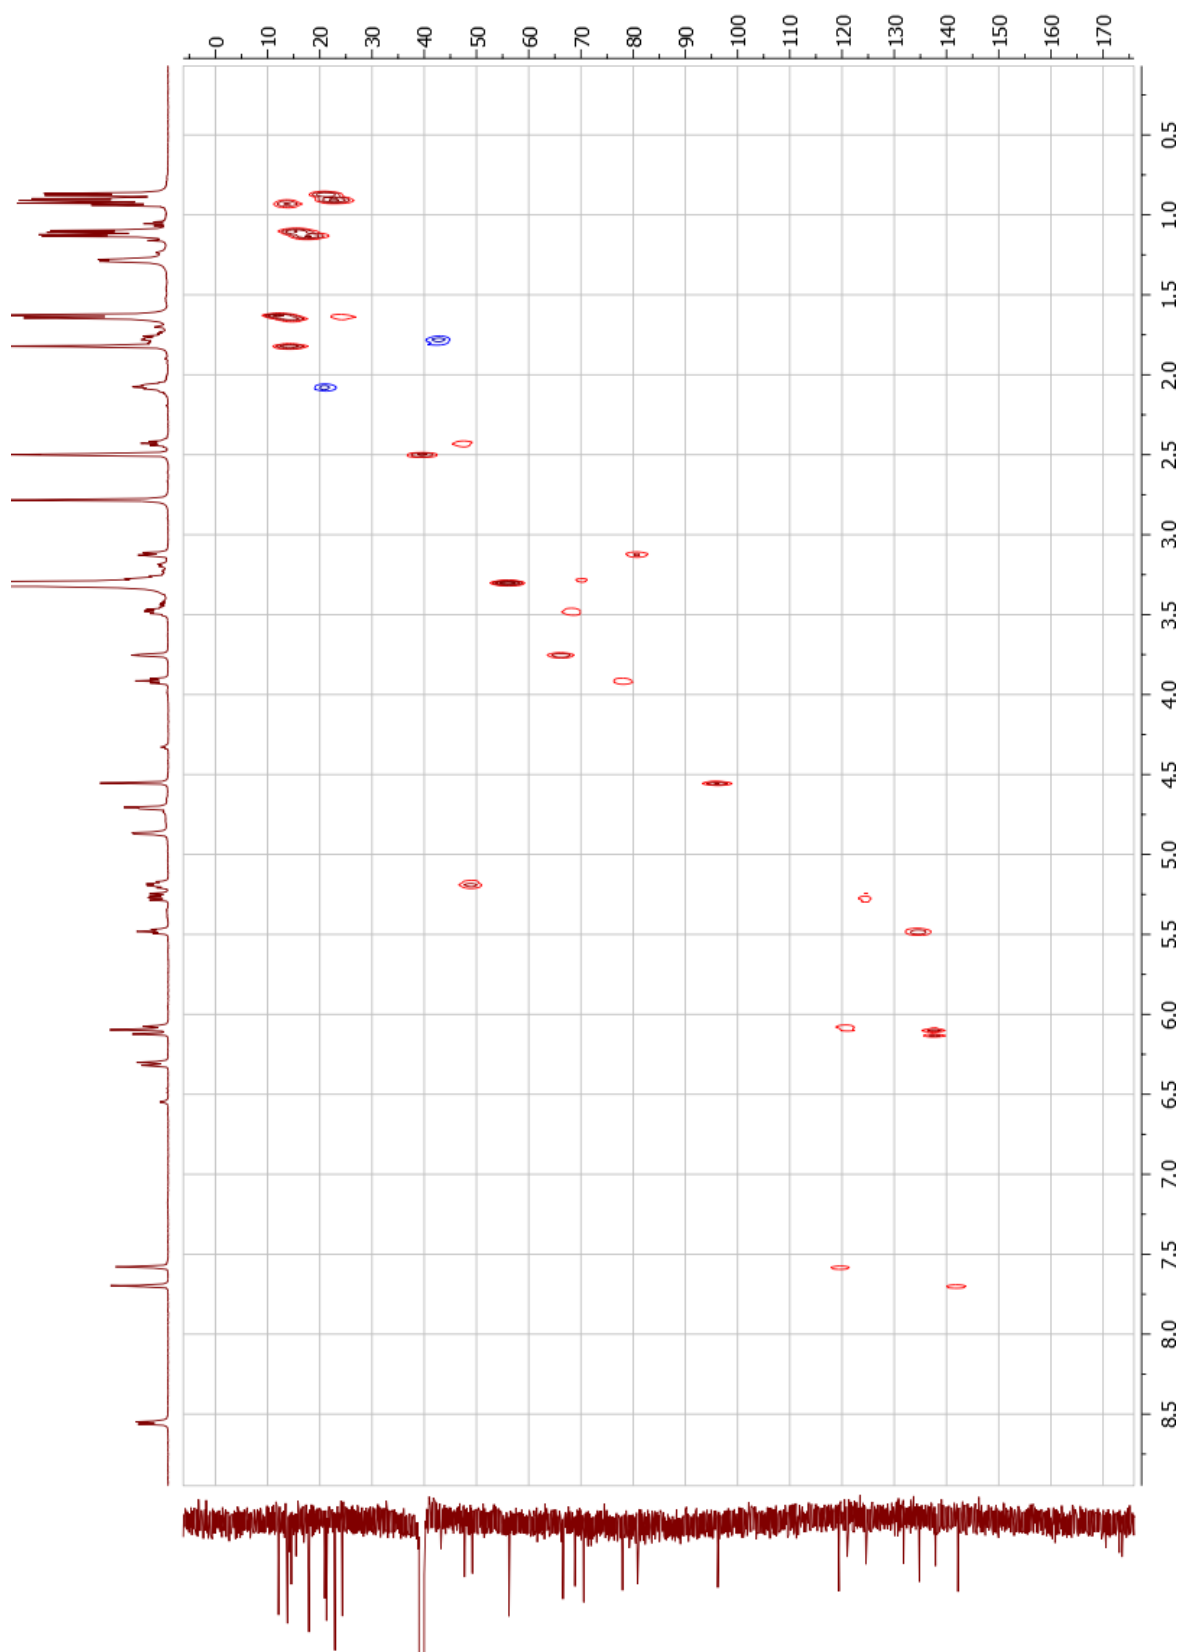

**Figure S12.** HSQC of iezoside B (**2**) in DMSO- $d_6$ .

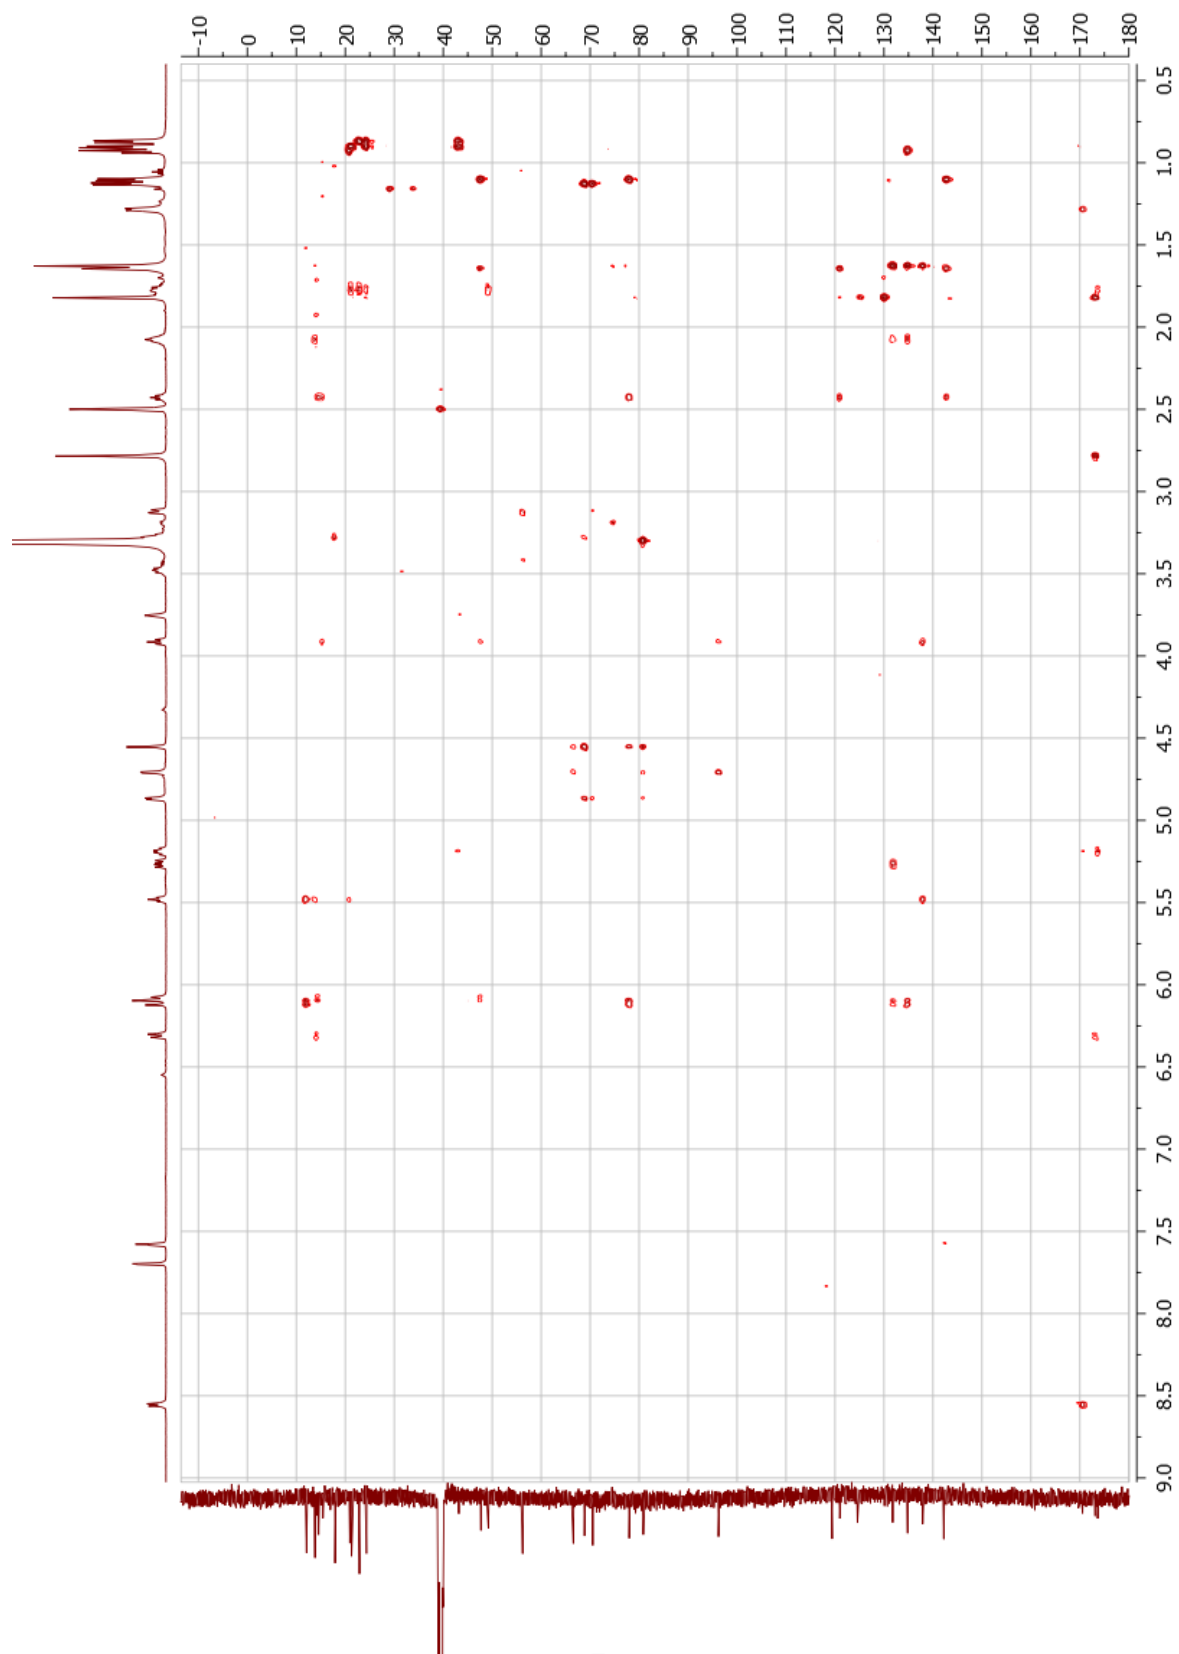

**Figure S13.** HMBC of iezoside B (**2**) in DMSO- $d_6$ .

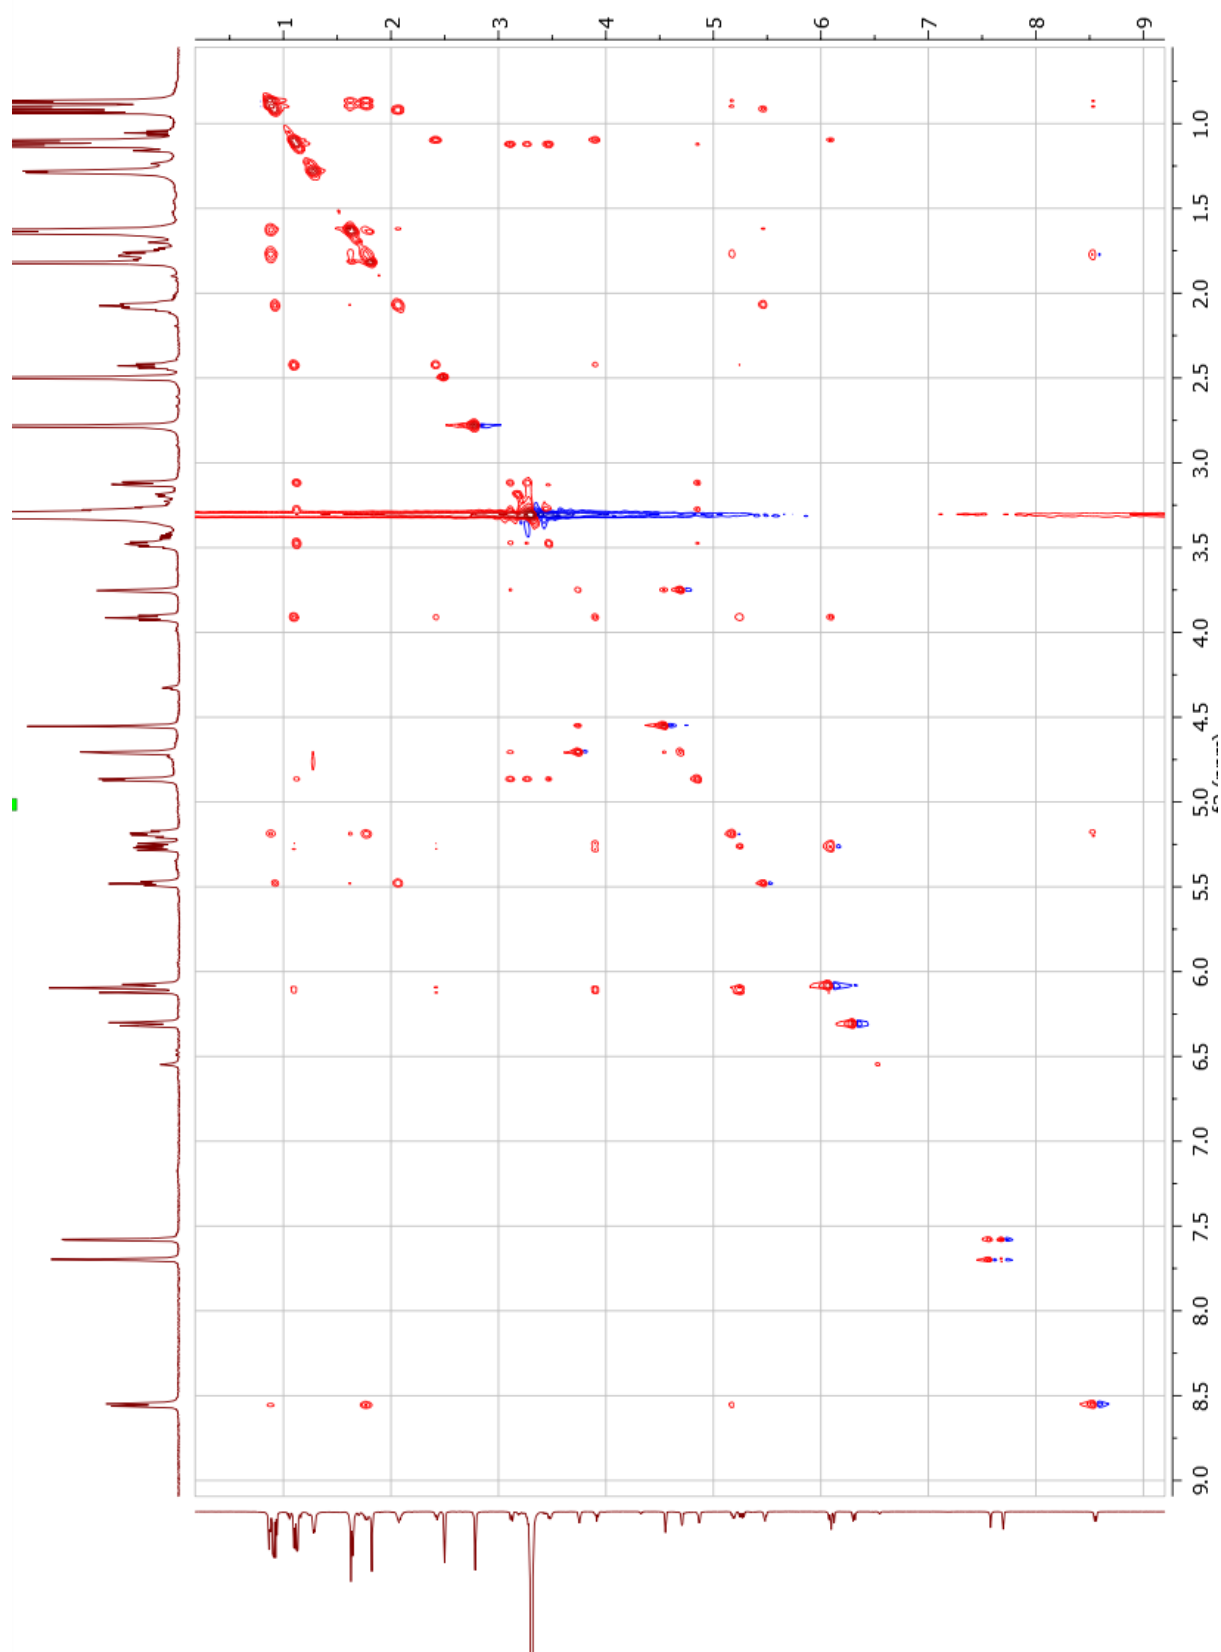

**Figure S14.** TOCSY of iezoside B (2) in DMSO- $d_6$ .



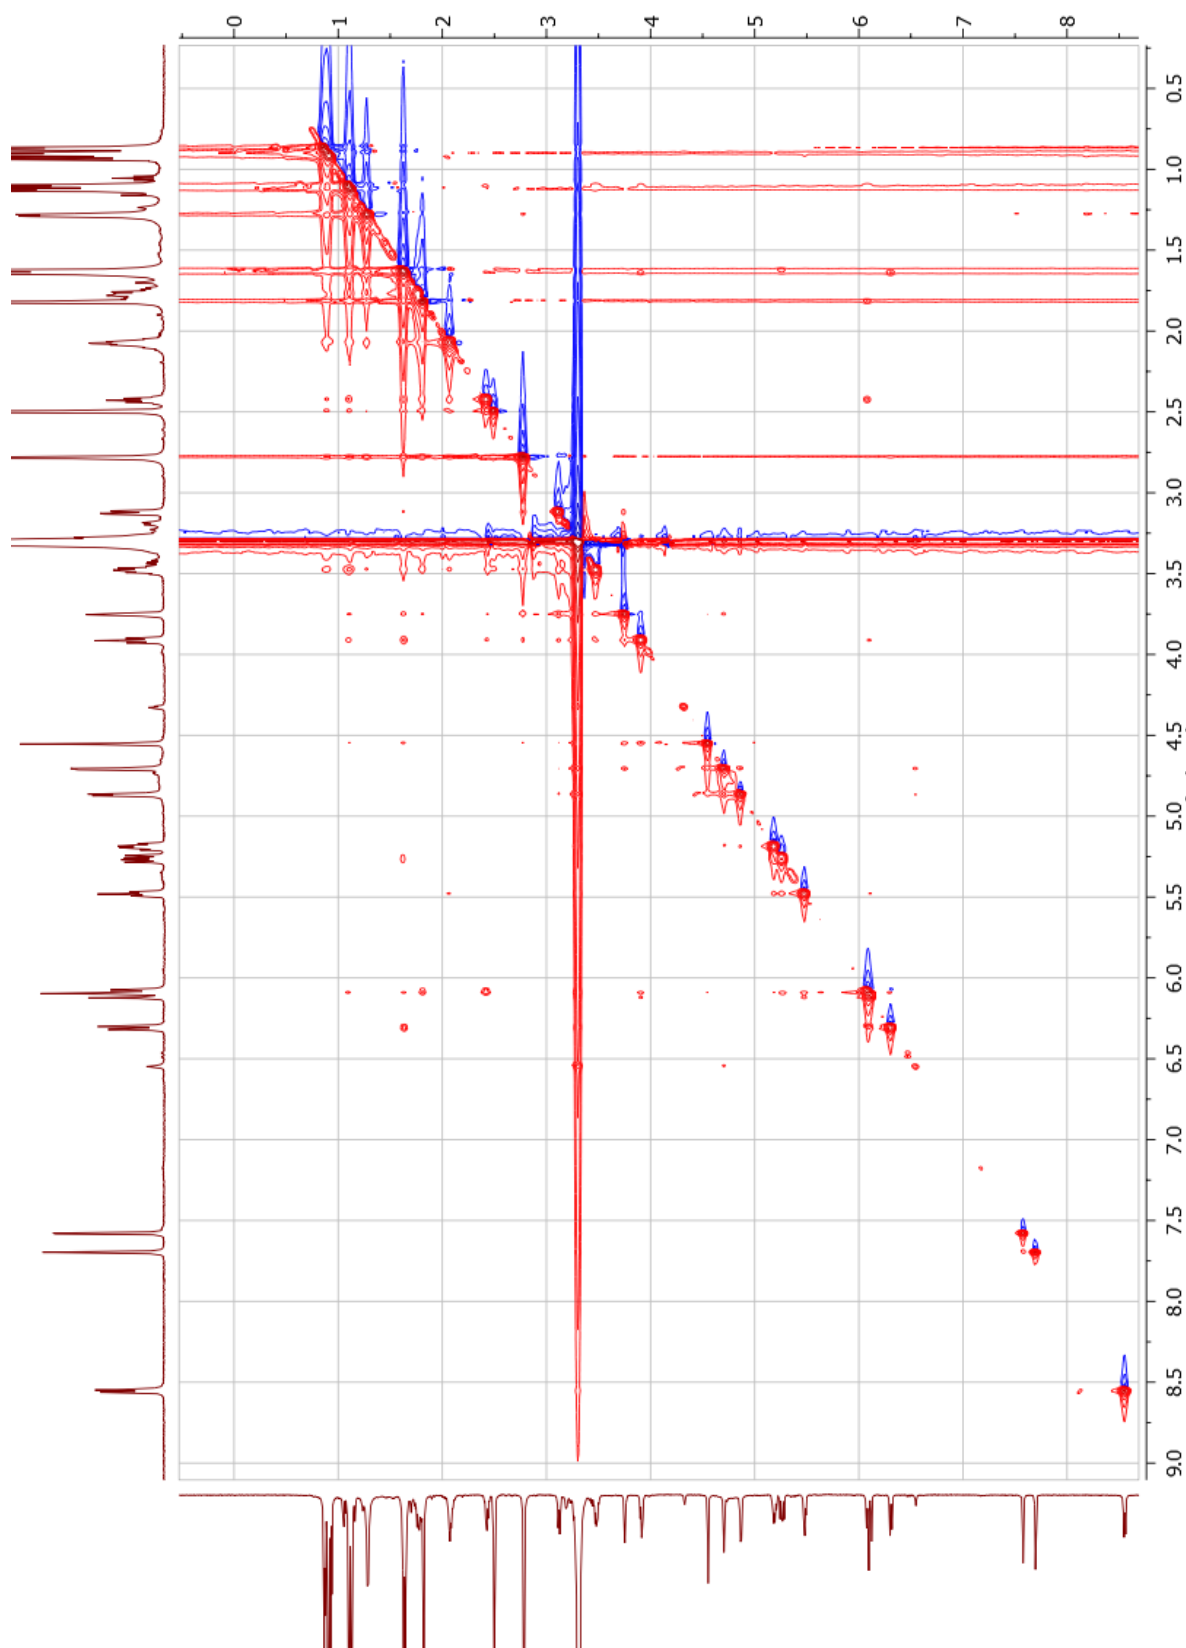

**Figure S15.** NOESY of iezoside B (**2**) in DMSO- $d_6$ .

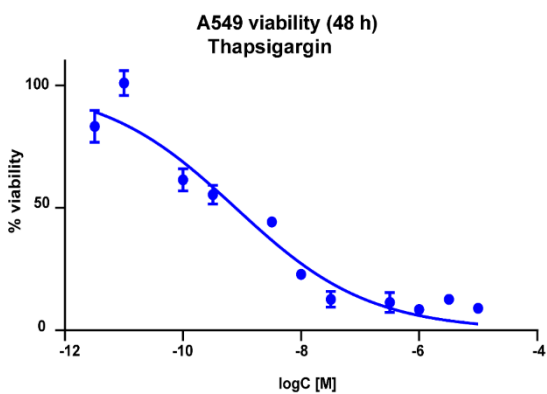

**Figure S16.** Dose-response curve (cell viability) for thapsigargin in A549 cells at 48 h.

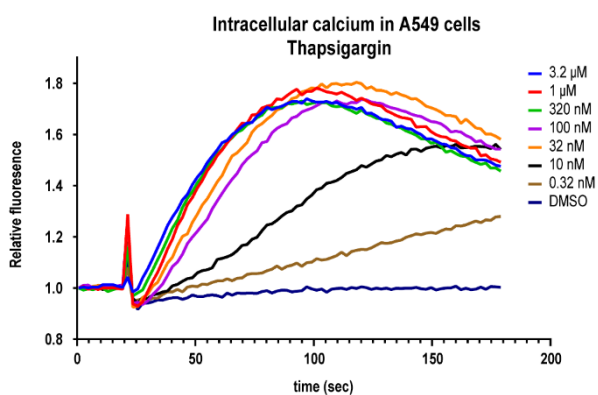

**Figure S17.** Effect of thapsigargin on cytosolic calcium in A549 cells.

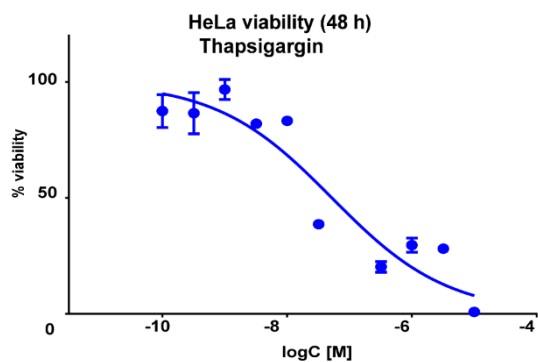

**Figure S18.** Dose-response curve (cell viability) for thapsigargin in HeLa cells at 48 h.

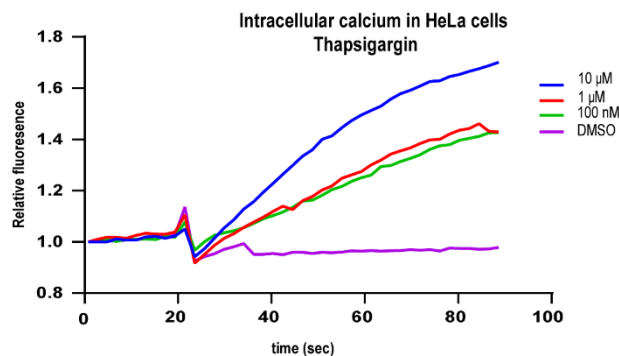

**Figure S19.** Effect of thapsigargin on cytosolic calcium in HeLa cells.

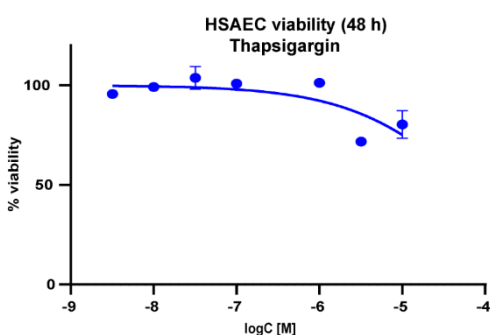

**Figure S20.** Dose-response curve (cell viability) for thapsigargin in HSAEC cells at 48 h.

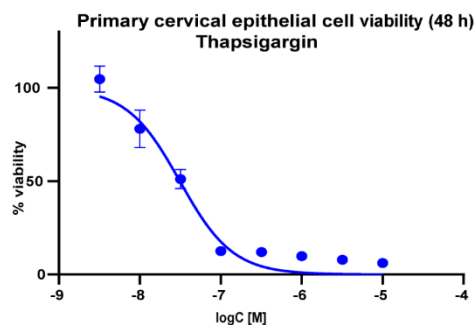

**Figure S21.** Dose-response curve (cell viability) for thapsigargin in primary cervical epithelial cells at 48 h.

## Reference

- (1) Kurisawa, N.; Iwasaki, A.; Teranuma, K.; Dan, S.; Toyoshima, C.; Hashimoto, M.; Suenaga, K. Structural Determination, Total Synthesis, and Biological Activity of lezoside, a Highly Potent  $\text{Ca}^{2+}$ -ATPase Inhibitor from the Marine Cyanobacterium *Leptochromothrix valapuliae*. *J. Am. Chem. Soc.* **2022**, *144*, 11019–11032. <https://doi.org/10.1021/jacs.2c04459>.
